# Supplementary material for: Summer Pruning Strategies for Balancing Growth and Yield in High-Density Apple Orchards
Source: Research Square preprint supplement (doi:10.21203/rs.3.rs-8595382/v1), 2026-02-10
Supplement: Supplementary file 1 [file 6825a51d7c936728a7f3085e.docx]

**Table 1 Effect of summer pruning on vegetative growth of apple cv. ‘Red Velox’ under high-density planting**

|  | | **tree height increase (%)** | | | **tree spread increase (%)** | | | **trunk girth increase (%)** | | |
| --- | --- | --- | --- | --- | --- | --- | --- | --- | --- | --- |
| **Pruning Time (DAFS)** | **Pruning intensity (buds)** | **2022** | **2023** | **Pooled mean** | **2022** | **2023** | **Pooled mean** | **2022** | **2023** | **Pooled mean** |
| T1 | B1 | 1.17 | 1.58 | 1.37 | 17.48 | 18.01 | 17.74 | 3.03 | 3.01 | 3.02 |
| T1 | B2 | 1.73 | 2.47 | 2.1 | 24.12 | 21.2 | 22.66 | 3.56 | 2.76 | 3.16 |
| T1 | B3 | 2.16 | 2.9 | 2.53 | 25.77 | 24.29 | 25.03 | 2.37 | 3.27 | 2.82 |
| T2 | B1 | 1.24 | 2.16 | 1.7 | 15.54 | 17.66 | 16.6 | 2.81 | 2.44 | 2.63 |
| T2 | B2 | 1.86 | 2.39 | 2.13 | 20.36 | 21.17 | 20.77 | 2.76 | 2.94 | 2.85 |
| T2 | B3 | 2.68 | 2.7 | 2.69 | 22.55 | 22.17 | 22.36 | 3.48 | 3.12 | 3.3 |
| T3 | B1 | 1.21 | 2.33 | 1.77 | 15.74 | 18.44 | 17.09 | 1.75 | 3.83 | 2.79 |
| T3 | B2 | 2.63 | 2.78 | 2.71 | 29.6 | 18.73 | 24.16 | 3.39 | 3.3 | 3.35 |
| T3 | B3 | 2.76 | 3.12 | 2.94 | 32.72 | 23.47 | 28.09 | 2.55 | 3.1 | 2.83 |
| T4 | B1 | 2.46 | 1.86 | 2.16 | 30.72 | 18.91 | 24.82 | 2.29 | 3.33 | 2.81 |
| T4 | B2 | 2.51 | 2.47 | 2.49 | 28.93 | 20.05 | 24.49 | 3.64 | 2.94 | 3.29 |
| T4 | B3 | 2.73 | 3.07 | 2.9 | 32.71 | 23.82 | 28.26 | 1.93 | 3.56 | 2.75 |
| T5 | B1 | 1.47 | 1.75 | 1.61 | 15.77 | 15.65 | 15.71 | 2.98 | 3.51 | 3.25 |
| T5 | B2 | 2.27 | 2.37 | 2.32 | 24.35 | 19.11 | 21.73 | 2.4 | 3.24 | 2.82 |
| T5 | B3 | 2.48 | 2.46 | 2.47 | 29.04 | 21.9 | 25.47 | 2.63 | 4.41 | 3.52 |
| Control | — | 3.68 | 2.49 | 3.09 | 34.16 | 25.87 | 30.02 | 3.26 | 2.96 | 3.11 |
|  | Mean | 2.19 | 2.43 | 2.31 | 24.97 | 20.65 | 22.81 | 2.80 | 3.23 | 3.02 |
|  | | LSD (0.05): Time (T) = 0.20; Intensity (B) = 0.15; T × B = 0.34; Control vs Treatments = 0.82; Y × T × B=0.48 | | | LSD (0.05): Time (T) = 1.64; Intensity (B) = 1.27; T × B = 2.83; Control vs Treatments = 1.08; Y × T × B= 4.01 | | | LSD (0.05): Time (T) = 0.09; Intensity (B) = 0.07; T × B = 0.16; Control vs Treatments = 0.82; Y × T × B= 0.23 | | |

Notes: T1 = 15 DAFS; T2 = 30 DAFS; T3 = 45 DAFS; T4 = 60 DAFS; T5 = 75 DAFS. B1 = 2 buds; B2 = 4 buds; B3 = 6 buds. Control = no pruning; Y= year

**Table 2 Effect of summer pruning on spur development and flowering behaviour of apple cv. ‘Red Velox’ under high-density planting**

|  | | **spur density (spurs/cm2 TCSA)** | | | **return bloom (****number of flowers/cm2 TCSA)** | | |
| --- | --- | --- | --- | --- | --- | --- | --- |
| **Pruning Time**  **(DAFS)** | **Pruning intensity (buds)** | **2022** | **2023** | **Pooled mean** | **2022** | **2023** | **Pooled mean** |
| T1 | B1 | 11.43 | 5.47 | 8.45 | 50.84 | 27.36 | 39.1 |
| T1 | B2 | 10.53 | 5.97 | 8.25 | 53.01 | 29.82 | 41.42 |
| T1 | B3 | 8.58 | 3.97 | 6.27 | 49.22 | 19.84 | 34.53 |
| T2 | B1 | 10.88 | 5.05 | 7.97 | 62.71 | 25.24 | 43.98 |
| T2 | B2 | 11.1 | 4.89 | 8.0 | 66.19 | 24.45 | 45.32 |
| T2 | B3 | 6.83 | 4.33 | 5.58 | 43.14 | 21.65 | 32.4 |
| T3 | B1 | 13.89 | 6.3 | 10.09 | 66.97 | 31.54 | 49.26 |
| T3 | B2 | 8.76 | 5.16 | 6.96 | 52.89 | 25.77 | 39.33 |
| T3 | B3 | 8.72 | 5.09 | 6.9 | 46.55 | 25.45 | 36.0 |
| T4 | B1 | 11.29 | 6.09 | 8.69 | 58.48 | 30.43 | 44.46 |
| T4 | B2 | 7.69 | 3.79 | 5.74 | 49.7 | 18.94 | 34.32 |
| T4 | B3 | 11.34 | 5.2 | 8.27 | 59.19 | 26.01 | 42.6 |
| T5 | B1 | 12.75 | 6.0 | 9.38 | 56.79 | 29.99 | 43.39 |
| T5 | B2 | 11.23 | 7.34 | 9.29 | 53.49 | 36.99 | 45.24 |
| T5 | B3 | 9.94 | 7.2 | 8.57 | 44.88 | 36.01 | 40.45 |
| Control | — | 3.03 | 2.3 | 2.67 | 17.86 | 11.51 | 14.68 |
|  | Mean | 9.87 | 5.26 | 7.57 | 51.99 | 26.31 | 39.15 |
|  | | LSD (0.05): Time (T) = 1.19; Intensity (B) = 0.92; T × B = 2.07; Control vs Treatments = 0.98; Y × T × B= 2.92 | | | LSD (0.05): Time (T) = 1.07; Intensity (B) = 0.83; T × B = 1.85; Control vs Treatments = 0.88; Y × T × B=2.62 | | |

Notes: T1 = 15 DAFS; T2 = 30 DAFS; T3 = 45 DAFS; T4 = 60 DAFS; T5 = 75 DAFS. B1 = 2 buds; B2 = 4 buds; B3 = 6 buds. Control = no pruning; Y= year

**Table 3 Effect of summer pruning on yield and productivity traits of apple cv. ‘Red Velox’ under high-density planting**

|  | | **fruit yield (t/ha)** | | | **yield efficiency (kg/cm2 TCSA)** | | | **productivity (kg/tree)** | | |
| --- | --- | --- | --- | --- | --- | --- | --- | --- | --- | --- |
| **Pruning Time (DAFS)** | **Pruning intensity (buds)** | **2022** | **2023** | **Pooled mean** | **2022** | **2023** | **Pooled mean** | **2022** | **2023** | **Pooled mean** |
| T1 | B1 | 8.88 | 10.09 | 9.49 | 0.89 | 0.9 | 0.89 | 30.33 | 40.37 | 35.35 |
| T1 | B2 | 8.82 | 8.22 | 8.52 | 0.69 | 0.65 | 0.67 | 35.28 | 32.88 | 34.08 |
| T1 | B3 | 10.77 | 10.33 | 10.55 | 0.64 | 0.58 | 0.61 | 42.5 | 41.32 | 41.91 |
| T2 | B1 | 11.37 | 10.01 | 10.69 | 0.68 | 0.59 | 0.64 | 42.83 | 40.03 | 41.43 |
| T2 | B2 | 11.58 | 9.68 | 10.63 | 0.62 | 0.54 | 0.58 | 42.64 | 38.71 | 40.68 |
| T2 | B3 | 3.42 | 10.34 | 6.88 | 0.17 | 0.52 | 0.34 | 16.36 | 41.35 | 28.85 |
| T3 | B1 | 10.73 | 11.33 | 11.03 | 0.92 | 0.97 | 0.94 | 42.92 | 45.33 | 44.13 |
| T3 | B2 | 10.20 | 11.21 | 10.70 | 0.54 | 0.7 | 0.62 | 40.8 | 44.83 | 42.82 |
| T3 | B3 | 7.65 | 7.85 | 7.75 | 0.54 | 0.55 | 0.54 | 30.61 | 31.41 | 31.01 |
| T4 | B1 | 10.70 | 7.80 | 9.25 | 0.79 | 0.61 | 0.7 | 42.81 | 31.2 | 37.01 |
| T4 | B2 | 7.68 | 6.59 | 7.14 | 0.37 | 0.31 | 0.34 | 30.71 | 26.37 | 28.54 |
| T4 | B3 | 9.93 | 9.60 | 9.77 | 0.73 | 0.73 | 0.73 | 39.73 | 38.41 | 39.07 |
| T5 | B1 | 10.22 | 8.77 | 9.50 | 1.09 | 0.81 | 0.95 | 40.89 | 35.09 | 37.99 |
| T5 | B2 | 7.99 | 7.07 | 7.53 | 0.53 | 0.65 | 0.59 | 31.95 | 28.29 | 30.12 |
| T5 | B3 | 6.95 | 7.03 | 6.99 | 0.56 | 0.79 | 0.68 | 27.81 | 28.11 | 27.96 |
| Control | — | 4.52 | 6.11 | 5.32 | 0.18 | 0.22 | 0.20 | 18.09 | 28.45 | 23.27 |
|  | Mean | 8.84 | 8.88 | 8.86 | 0.62 | 0.63 | 0.63 | 34.77 | 35.76 | 35.26 |
|  | | LSD (0.05): Time (T) = 0.97; Intensity (B) = 0.75; T × B = 1.69; Control vs Treatments = 0.83; Y × T × B= 2.38 | | | LSD (0.05): Time (T) = 0.13; Intensity (B) = 0.10; T × B = 0.22; Control vs Treatments = 0.82; Y × T × B= 0.31 | | | LSD (0.05): Time (T) = 1.79; Intensity (B) = 1.39; T × B = 3.11; Control vs Treatments = 1.03; Y × T × B= 4.39 | | |

Notes: T1 = 15 DAFS; T2 = 30 DAFS; T3 = 45 DAFS; T4 = 60 DAFS; T5 = 75 DAFS. B1 = 2 buds; B2 = 4 buds; B3 = 6 buds. Control = no pruning; Y= year
